# Supplementary material for: Virtual Screening Using Pharmacophore Models Retrieved from Molecular Dynamic Simulations
Source: MDPI journal article supplement (doi:10.3390/ijms20235834), 2019-11-20
Supplement: s1 [file s1]

**Supplementary Materials:**

# **Virtual Screening Using Pharmacophore Models Retrieved From Molecular Dynamic Simulations**

**Pavel Polishchuk <sup>1,\*</sup>, Alina Kutlushina <sup>1</sup>, Dayana Bashirova <sup>2</sup>, Olena Mokshyna <sup>1</sup> and Timur Madzhidov <sup>2</sup>**

<sup>1</sup> Institute of Molecular and Translational Medicine, Faculty of Medicine and Dentistry, Palacky University and University Hospital in Olomouc, Hnevotinska 5, 77900 Olomouc, Czech Republic; alina.kutlushina@upol.cz (A.K.), olena.mokshyna@upol.cz (O.M.)

<sup>2</sup> A.M. Butlerov Institute of Chemistry, Kazan Federal University, Kremlyovskaya Str. 18, 420008 Kazan, Russia; dayana.bashirova@yandex.ru (D.B.), timur.madzhidov@kpfu.ru (T.M.)

\* Correspondence: pavlo.polishchuk@upol.cz; Tel.: +420-585632298

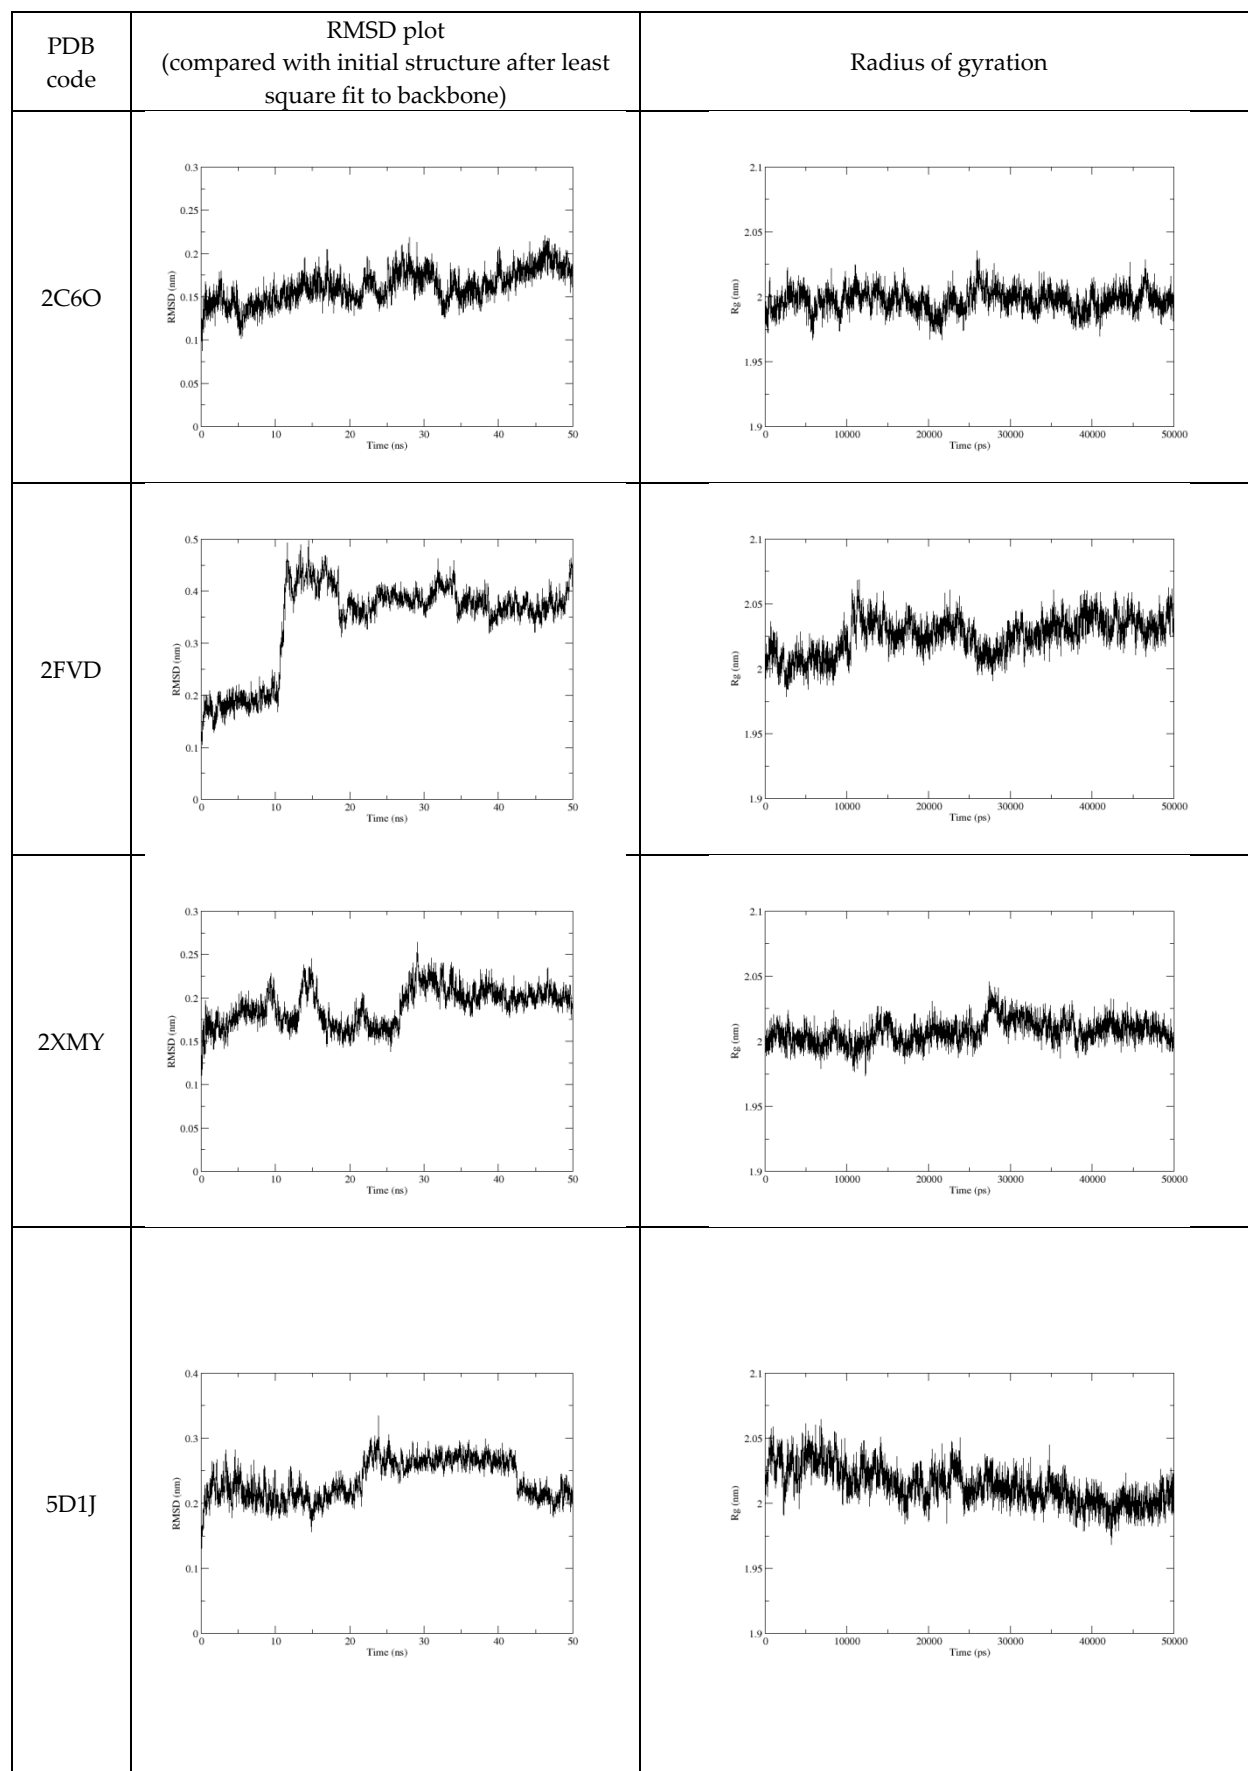

**Figure S1.** RMSD and radius of gyration plots from MD simulation of four studied complexes.

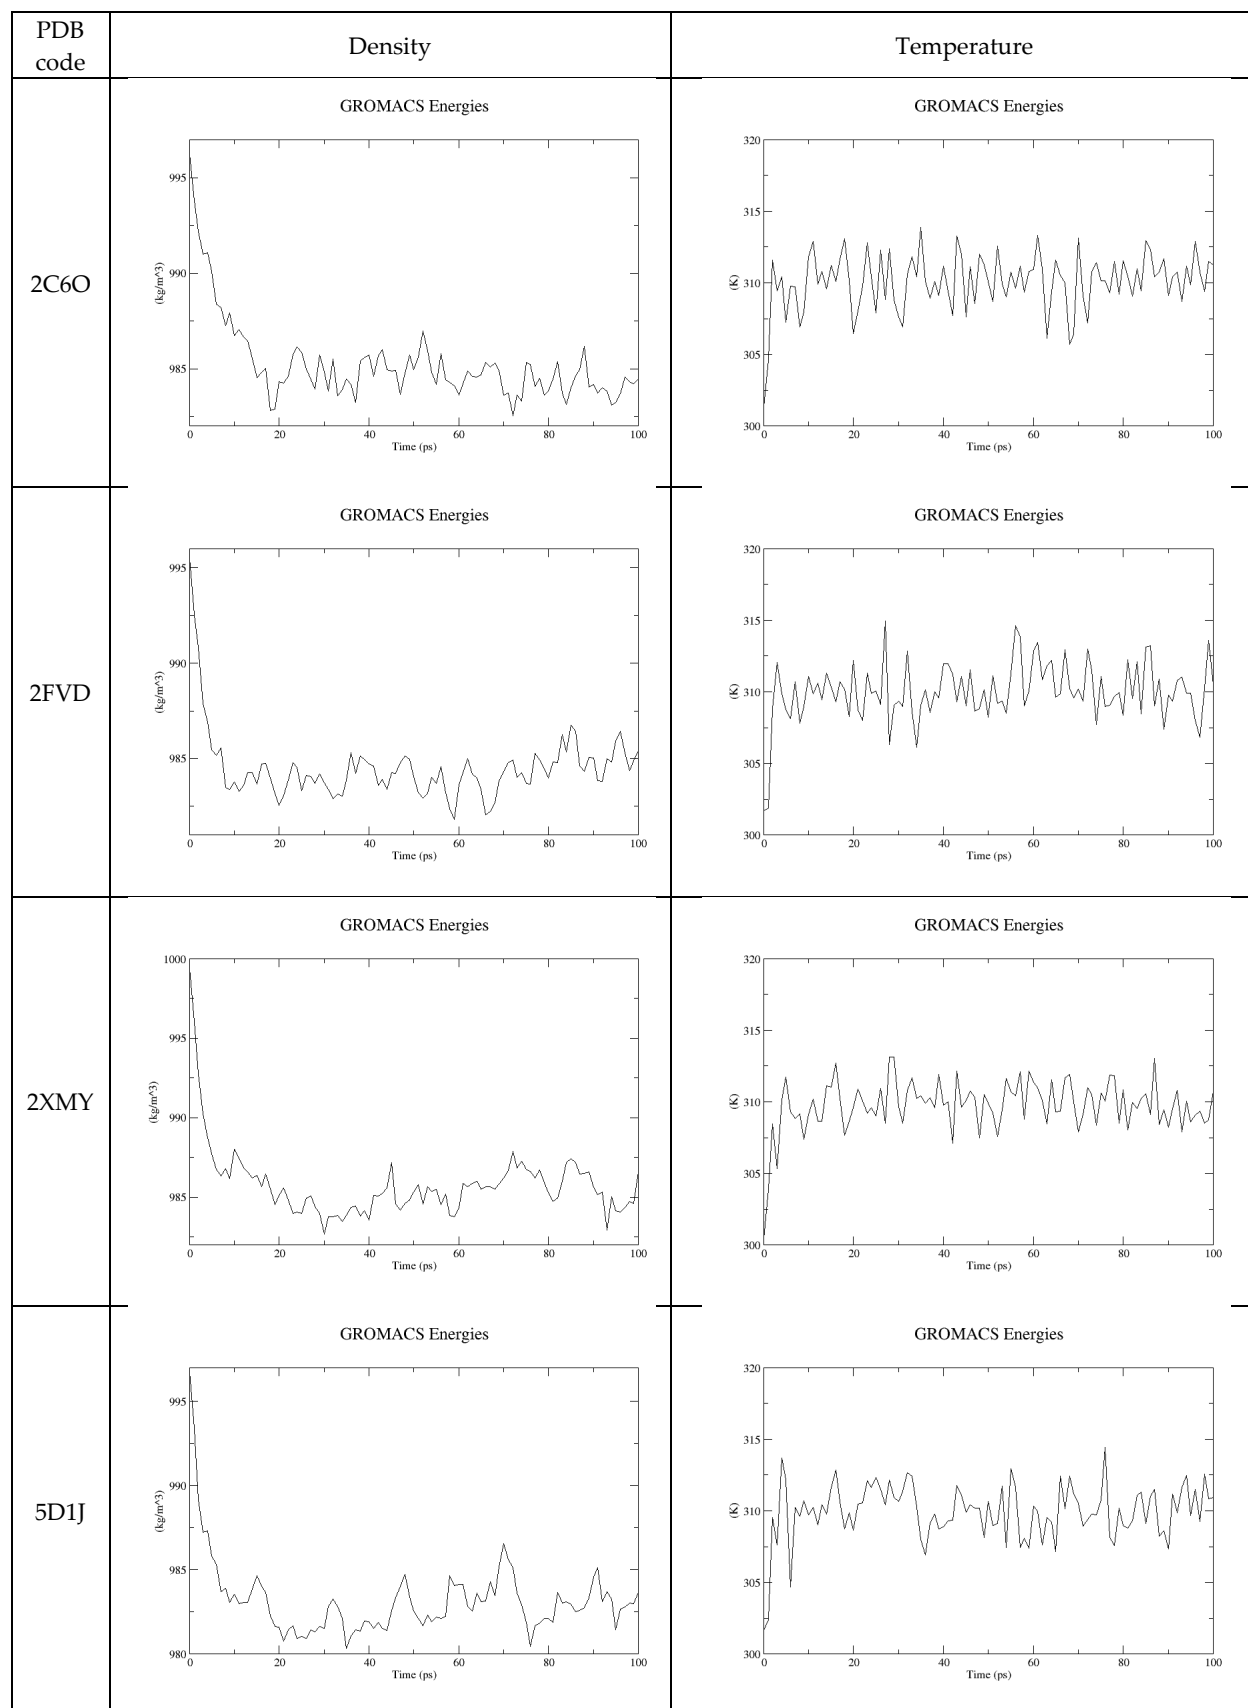

Figure S2. Density and temperature plot during the equilibration stage of MD simulations of four studied complexes.

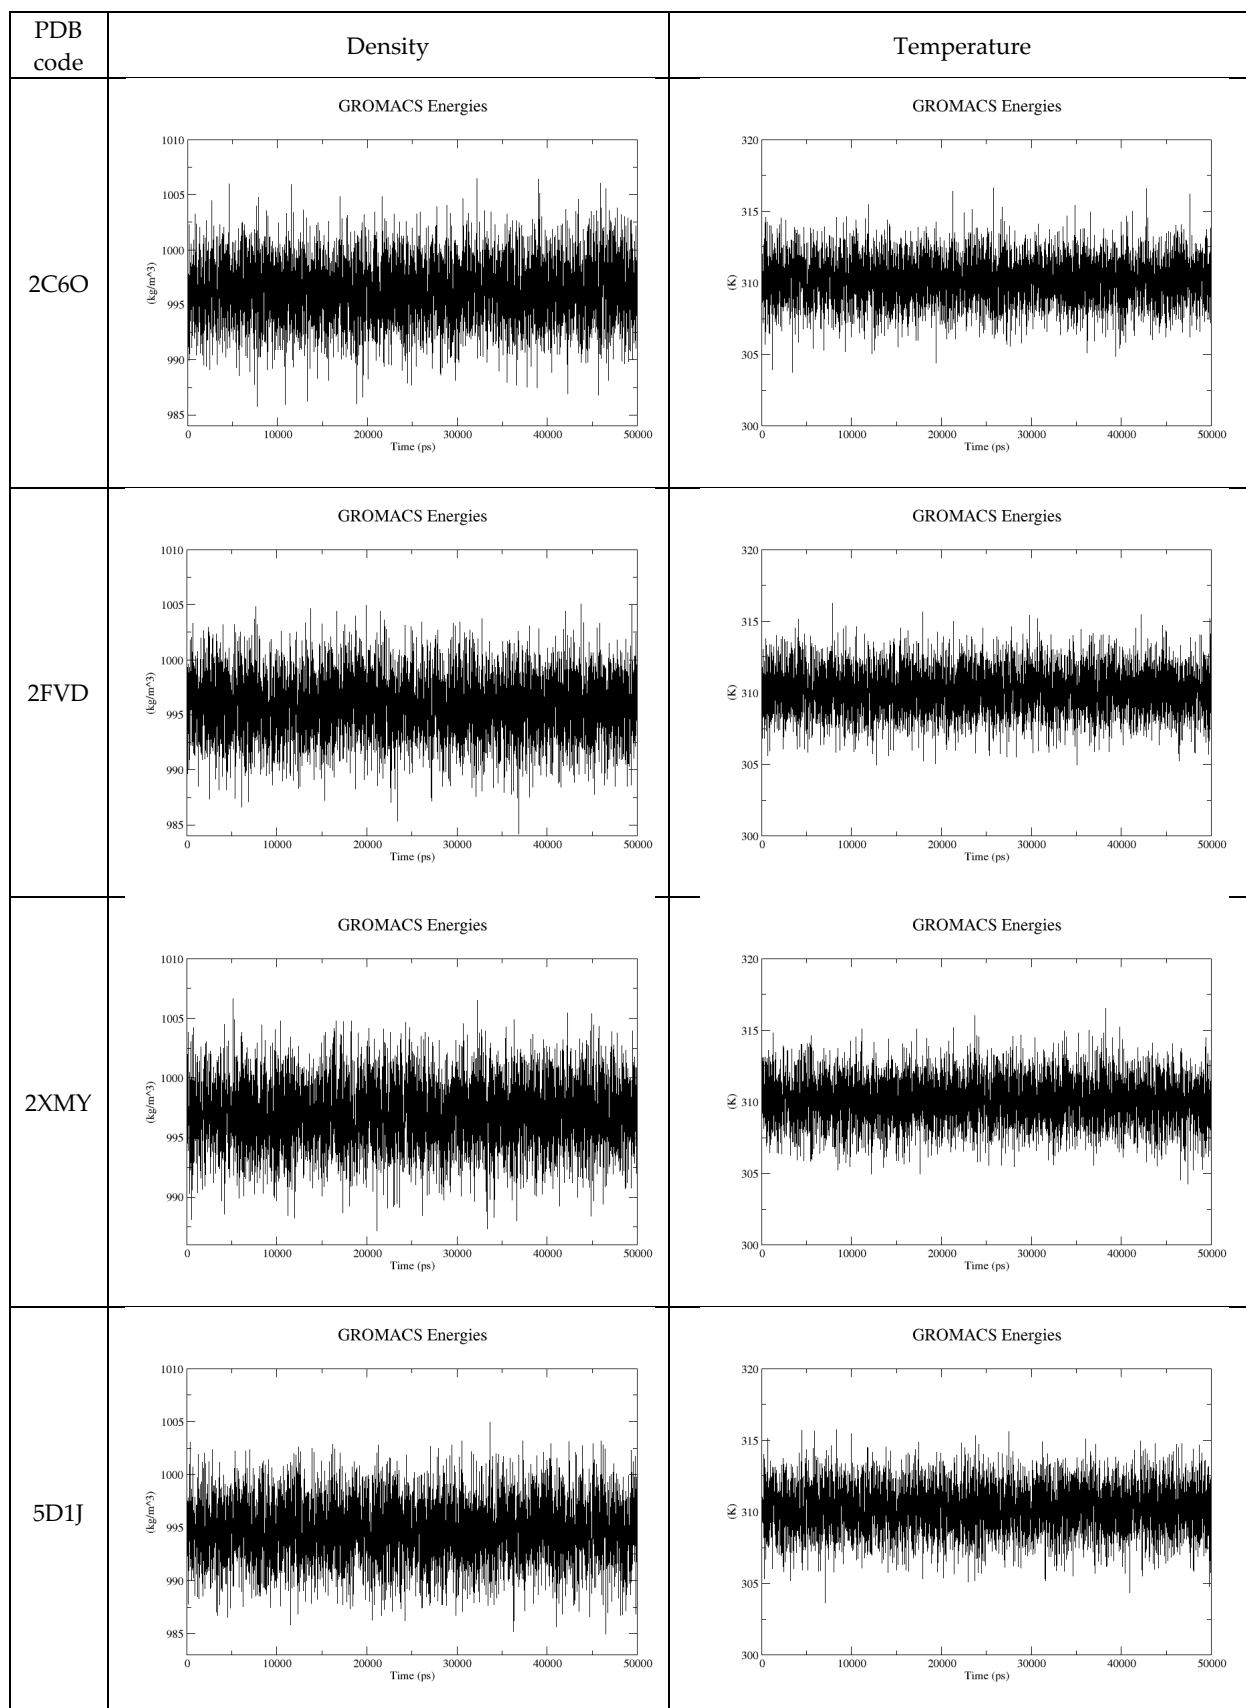

**Figure S3.** Density and temperature plot during the production stage of MD simulations of four studied complexes.
